# Supplementary material for: Профессионально значимые индивидуально-психологические особенности руководителей ОВД
Source: Royal Society of Chemistry journal article supplement (doi:10.1039/c0cp02204g), 2013-01-01
Supplement: c0cp02204g.pdf [file c0cp02204g.pdf]

## Supporting Information

# Fabrication of CuInS<sub>2</sub> Films from Electrodeposited Cu/In Bilayers: Effects of Preheat Treatment on Their Structural, Photoelectrochemical and Solar Cell Properties

Sun Min Lee,<sup>a</sup> Shigeru Ikeda,<sup>a</sup> Tetsuro Yagi,<sup>a</sup> Takashi Harada,<sup>a</sup> Ahmed Ennaoui<sup>b</sup>, Michio Matsumura<sup>a,\*</sup>

<sup>a</sup>Research Center for Solar Energy Chemistry, Osaka University, Toyonaka 560-8531, Japan

<sup>b</sup>Helmholtz-Zentrum-Berlin, Glienickerstr. 100, D14109 Berlin, Germany

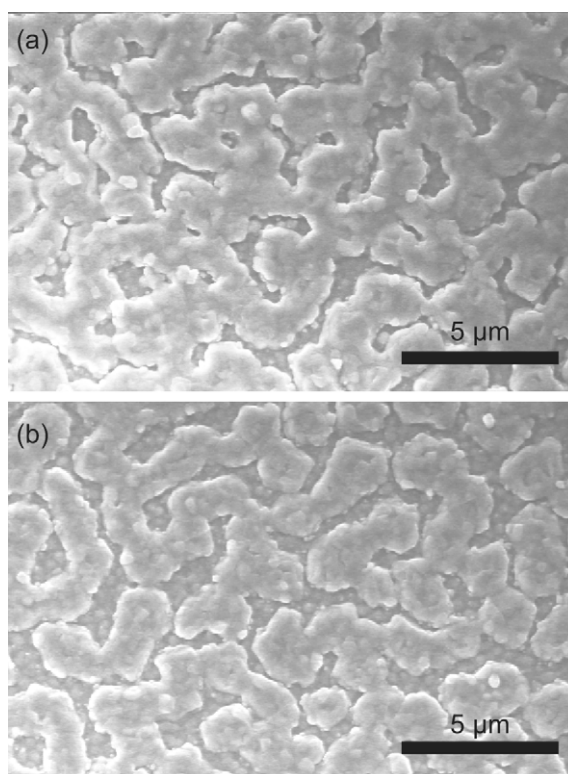

**Figure S1.** Top-view SEM images of Cu/In bilayers after 110 °C treatment for (a) 10 min and (b) 60 min.

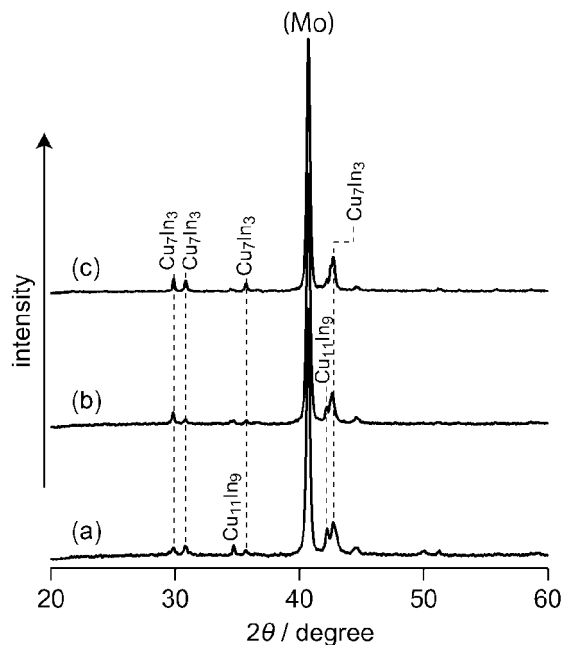

**Figure S2.** XRD patterns of 520 °C-heated films obtained from (a) the as-deposited Cu/In bilayer and the Cu/In bilayer after 110 °C treatment for (b) 10 min and (c) 60 min.

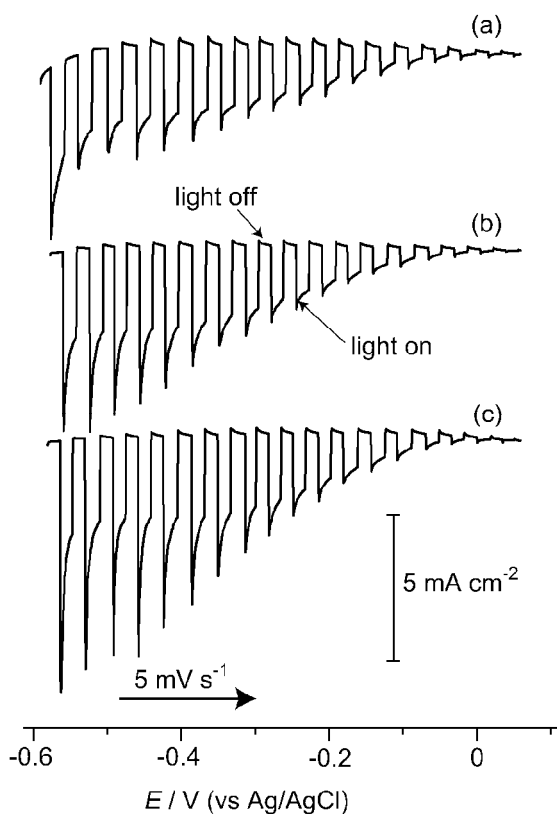

**Figure S3.** Current density vs potential scans of  $\text{CuInS}_2$  films obtained from (a) the as-deposited Cu/In bilayer and the Cu/In bilayer after 110 °C treatment for (b) 10 min and (c) 60 min in  $50 \text{ mmol dm}^{-3}$   $\text{Eu}(\text{NO}_3)_3$  solution (pH 4) under chopped illumination from a Xe lamp.
